# Supplementary material
Source: publisher site journal article supplement (https://www.spandidos-publications.com/4624/downloadSupplementary)

Figure S1. Flow cytometry results demonstrating that linc01614 knockdown had no significant effect on the apoptosis of Panc-1 and SW1990 cells.

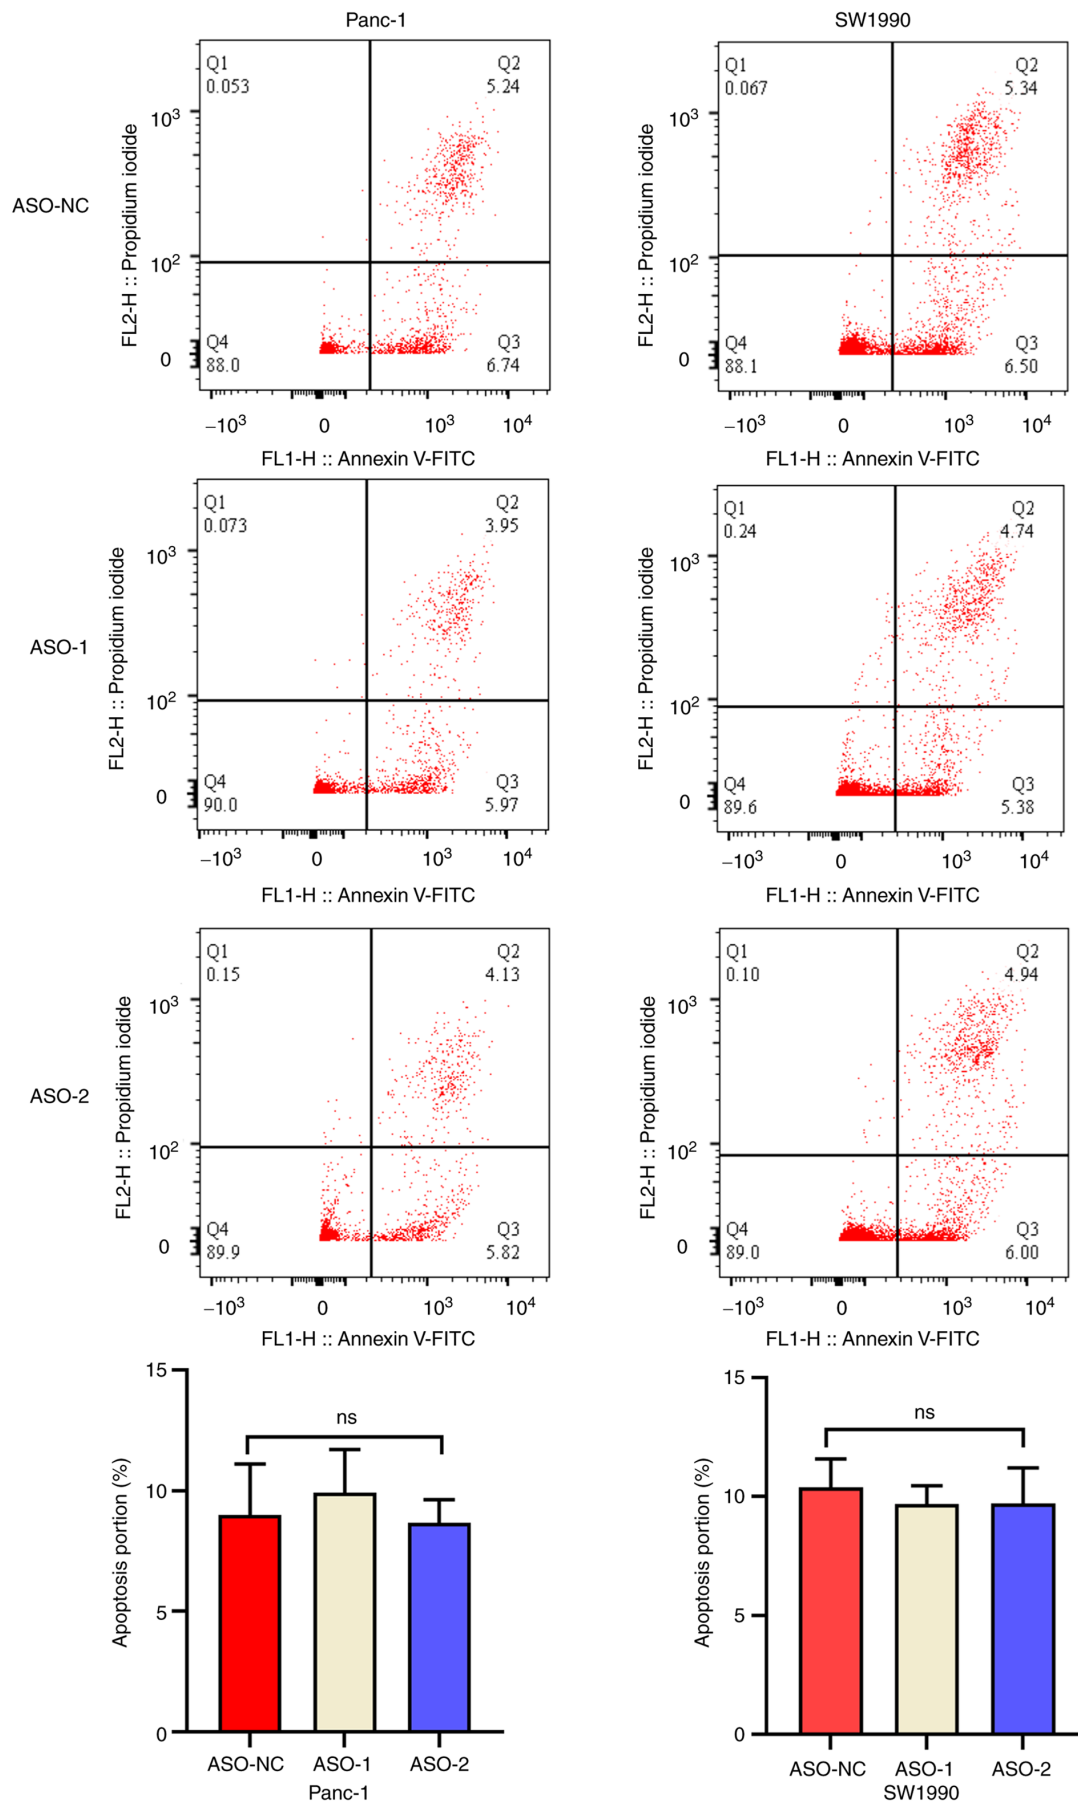

Figure S2. Effects of linc0164 upregulation on HPDE cells. (A) Representative images of HPDE cells transfected with linc01614 plasmid and negative control (vector). Magnification, x100. (B) reverse transcription-quantitative polymerase chain reaction for the evaluation of linc01614 transfection efficacy in HPDE cells. (C) EdU assay for the evaluation of the increase in HPDE cell proliferation upon the upregulation of linc01614. Magnification, x200. (D) Flow cytometry demonstrated no significant effect on the apoptosis in HPDE cells, following linc01614 overexpression. Data are presented as the mean  $\pm$  SD. \*\* $P < 0.01$  vs. the negative control (ns, not significant).

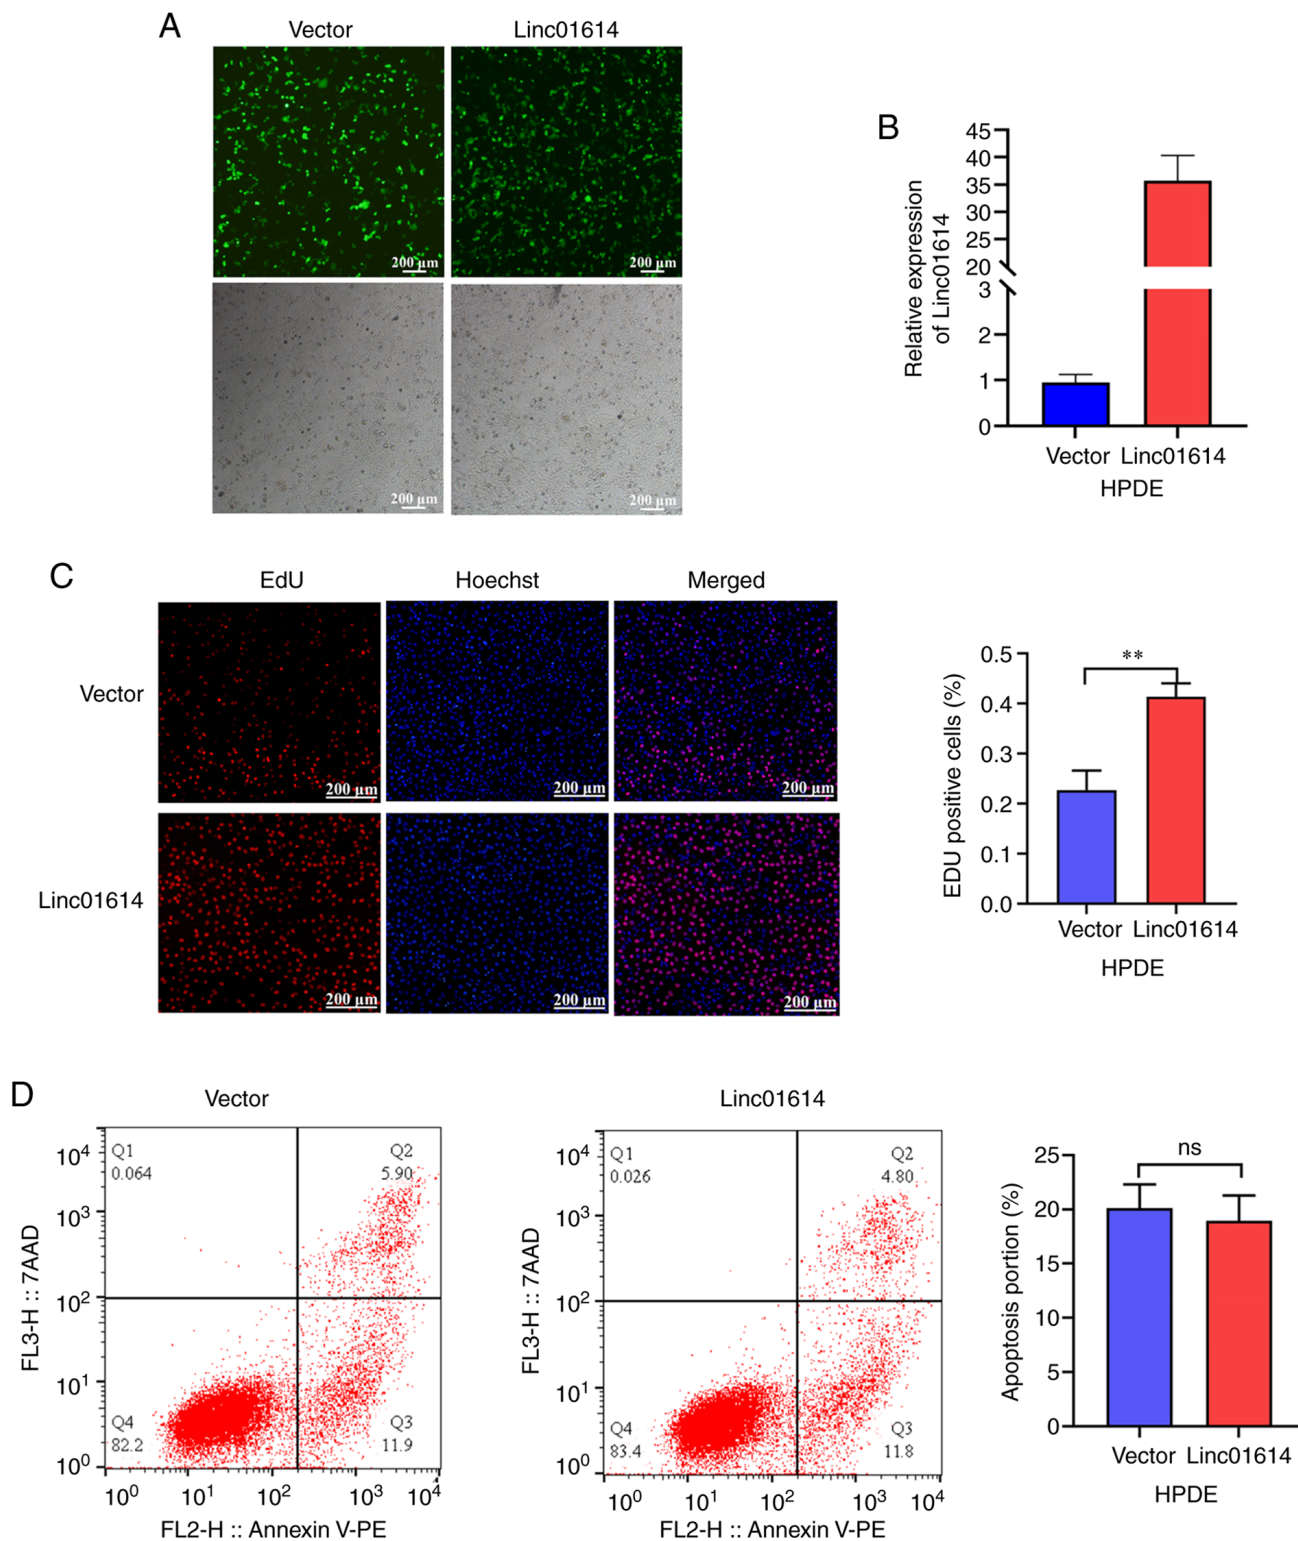

Figure S3. Mass spectrometry illustrating the GSK-3β peptides.

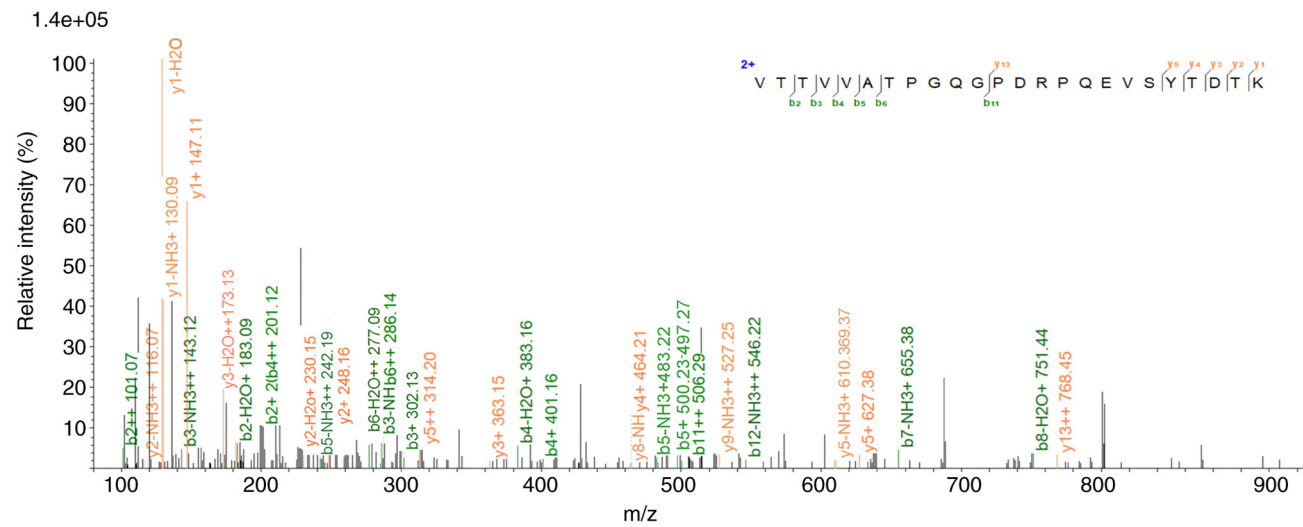

Supplement: Supplementary file 1 [file downloadSupplementary]
